# Supplementary material
Source: PubMed Central journal article supplement (PMC8049537)
Supplement: NIHMS1683974-supplement-1.pdf [file NIHMS1683974-supplement-1.pdf]

**eTable 1: Variables included in the final model**

| <b>Variable Name</b>                                                      | <b>Source of data</b> | <b>Unit</b>               |
|---------------------------------------------------------------------------|-----------------------|---------------------------|
| Age                                                                       | Patient               | years                     |
| Gender                                                                    | Patient               |                           |
| Length of stay                                                            | Visit                 | days                      |
| Admission type                                                            | Visit                 |                           |
| Admission Source                                                          | Visit                 |                           |
| Respiratory rate                                                          | Vitals Flowsheet      | rate per minute           |
| Pulse                                                                     | Vitals Flowsheet      | rate per minute           |
| Diastolic blood pressure                                                  | Vitals Flowsheet      | mmHg                      |
| Percutaneous oxygen saturation                                            | Vitals Flowsheet      | %                         |
| Systolic blood pressure                                                   | Vitals Flowsheet      | mmHg                      |
| Temperature                                                               | Vitals Flowsheet      | degree Fahrenheit         |
| Blood urea nitrogen                                                       | Laboratory            | mg/dL                     |
| Serum Creatinine                                                          | Laboratory            | mg/dL                     |
| Platelet count                                                            | Laboratory            | $\times 10^3/\mu\text{L}$ |
| Serum chloride                                                            | Laboratory            | mmol/L                    |
| Anion gap                                                                 | Laboratory            | mEq/L                     |
| Serum sodium                                                              | Laboratory            | mEq/L                     |
| Corrected WBC count                                                       | Laboratory            | $\times 10^3/\mu\text{L}$ |
| C-reactive protein                                                        | Laboratory            | mg/L                      |
| Red blood cell count                                                      | Laboratory            | $\times 10^6/\mu\text{L}$ |
| Partial pressure of carbon dioxide in arterial blood (PACO <sub>2</sub> ) | Laboratory            | mmHg                      |
| Partial pressure of oxygen in arterial blood (PAO <sub>2</sub> )          | Laboratory            | mmHg                      |
| Partial pressure of carbon dioxide in venous blood (PVC <sub>2</sub> )    | Laboratory            | mmHg                      |
| Partial pressure of oxygen in venous blood (PVO <sub>2</sub> )            | Laboratory            | mmHg                      |
| Serum potassium                                                           | Laboratory            | mEq/L                     |
| Activated partial thromboplastin time                                     | Laboratory            | seconds                   |
| Serum lactate                                                             | Laboratory            | mmol/L                    |
| pH of arterial blood                                                      | Laboratory            |                           |
| Serum total protein                                                       | Laboratory            | g/dL                      |
| Hemoglobin                                                                | Laboratory            | g/dL                      |
| Complement C3                                                             | Laboratory            | mg/dL                     |
| Complement C4                                                             | Laboratory            | mg/dL                     |

|                                             |                   |                                   |
|---------------------------------------------|-------------------|-----------------------------------|
| Interleukin 1 beta                          | Laboratory        | pg/ml                             |
| Interleukin 6                               | Laboratory        | pg/ml                             |
| Interleukin 17                              | Laboratory        | pg/ml                             |
| D-dimer                                     | Laboratory        | mg/mL fibrinogen equivalent units |
| Aspartate aminotransferase                  | Laboratory        | IU/L                              |
| Alanine aminotransferase                    | Laboratory        | IU/L                              |
| Serum calcium                               | Laboratory        | mg/dL                             |
| Serum ferritin                              | Laboratory        | ng/mL                             |
| Lymphocyte count                            | Laboratory        | $\times 10^9/L$                   |
| Lactate dehydrogenase                       | Laboratory        | U/L                               |
| Serum albumin                               | Laboratory        | g/dL                              |
| NT-pro hormone B-type natriuretic peptide   | Laboratory        | pg/mL                             |
| pH of venous blood                          | Laboratory        |                                   |
| Bicarbonates by arterial blood gas analysis | Laboratory        | mEq/L                             |
| Serum direct bilirubin                      | Laboratory        | mg/dL                             |
| Serum total bilirubin                       | Laboratory        | mg/dL                             |
| T wave axis                                 | Electrocardiogram | angle in degrees                  |
| P wave axis                                 | Electrocardiogram | angle in degrees                  |
| R wave axis                                 | Electrocardiogram | angle in degrees                  |
| Atrial rate                                 | Electrocardiogram | rate per minute                   |
| Ventricular rate                            | Electrocardiogram | rate per minute                   |
| PR interval                                 | Electrocardiogram | milliseconds                      |
| QRS duration                                | Electrocardiogram | milliseconds                      |

**eTable 2: Model hyperparameters**

| <b>Hyperparameter</b>                                       | <b>Search Space</b>    | <b>Optimal value used in the final model</b> |
|-------------------------------------------------------------|------------------------|----------------------------------------------|
| Number of trees to train                                    | ["500,600"]            | 600                                          |
| Maximum depth of the tree                                   | ["3, 5,7,9,11"]        | 3                                            |
| Maximum number of bins for discretizing continuous features | ["10,15,20,25,30"]     | 10                                           |
| Number of features to consider for splits at each tree node | ["onethird,sqrt,log2"] | One third                                    |

Accepted Manuscript Version
